# Supplementary material for: Paracrine communication maximizes cellular response fidelity in wound signaling
Source: eLife journal article supplement (doi:10.7554/elife.09652), 2015-10-08
Supplement: supp [file elife-09652-supp-v1.zip]

Archive with 13 entries (13 files):
- elife_poa_e09652_Figure_1_figure_supplement_8.pdf
- elife_poa_e09652_Video_2.avi
- elife_poa_e09652_Video_1.avi
- elife_poa_e09652_Figure_1_figure_supplement_5.pdf
- elife_poa_e09652_Figure_1_figure_supplement_9.pdf
- elife_poa_e09652_Figure_1_figure_supplement_6.pdf
- elife_poa_e09652_Figure_1_figure_supplement_7.pdf
- elife_poa_e09652_Figure_2_figure_supplement_1.pdf
- elife_poa_e09652_Figure_1_figure_supplement_2.pdf
- elife_poa_e09652_Figure_1_figure_supplement_3.pdf
- elife_poa_e09652_Figure_1_figure_supplement_4.pdf
- elife_poa_e09652_Figure_1_figure_supplement_1.pdf
- elife_poa_e09652_Figure_3_figure_supplement_1.pdf
