# Supplementary figures and images for: Paracrine communication maximizes cellular response fidelity in wound signaling
Source: eLife journal article supplement (doi:10.7554/elife.09652), 2015-10-08

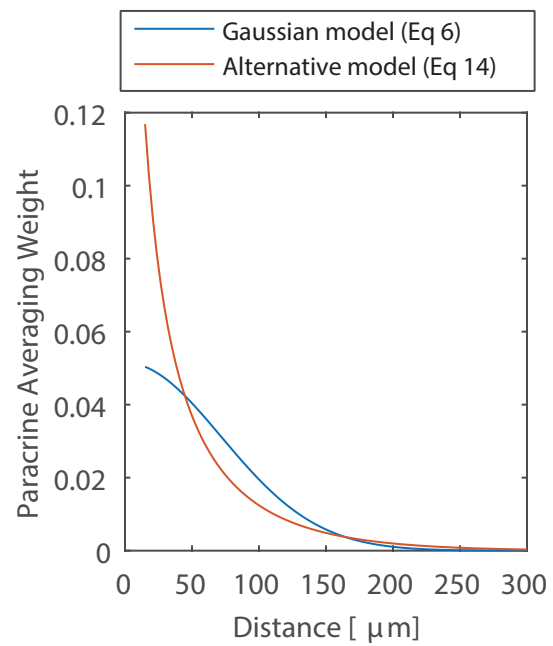

Supplement: supp [file elife-09652-supp-v1.zip]

Mutual Information of Locally Averaged Max  $\text{Ca}^{2+}$

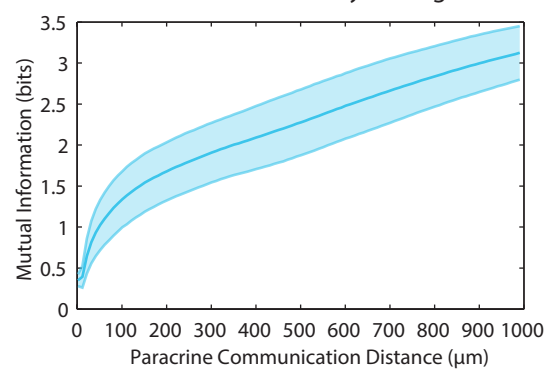

Supplement: supp [file elife-09652-supp-v1.zip]

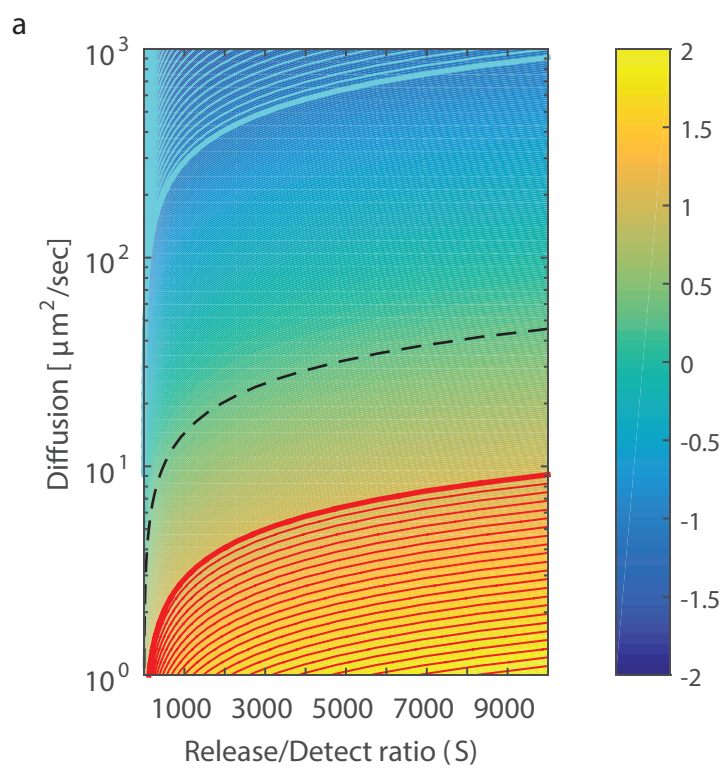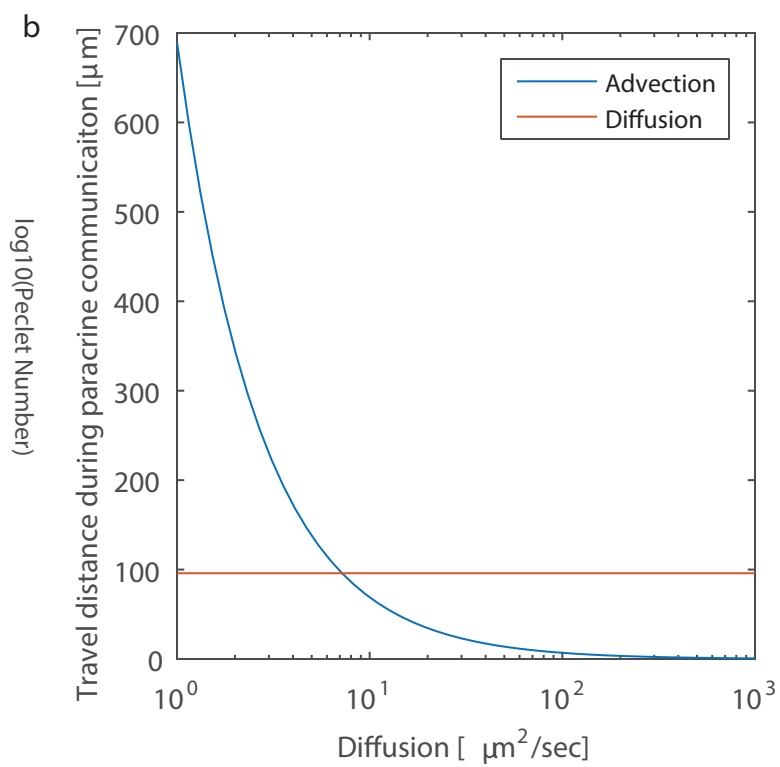

Supplement: supp [file elife-09652-supp-v1.zip]

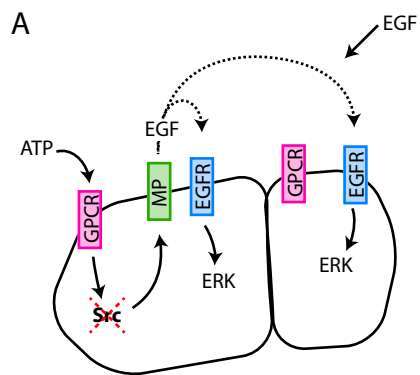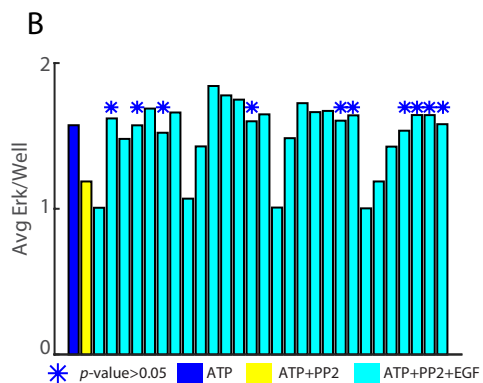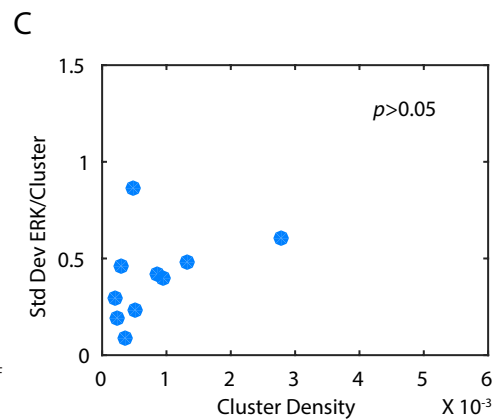

Supplement: supp [file elife-09652-supp-v1.zip]

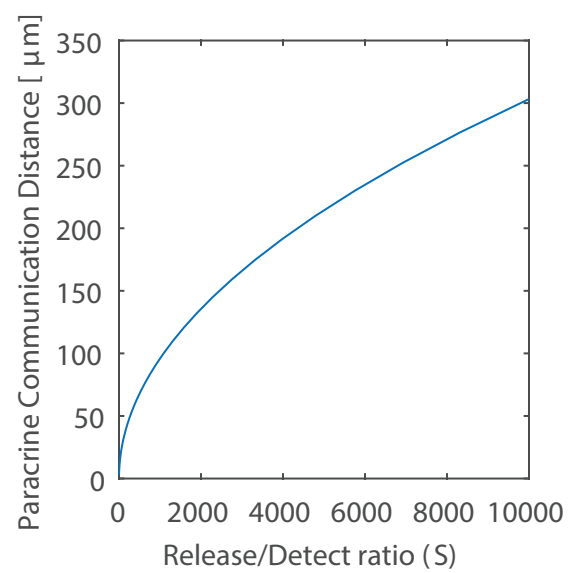

Supplement: supp [file elife-09652-supp-v1.zip › elife_poa_e09652_Figure_1_figure_supplement_6.pdf]

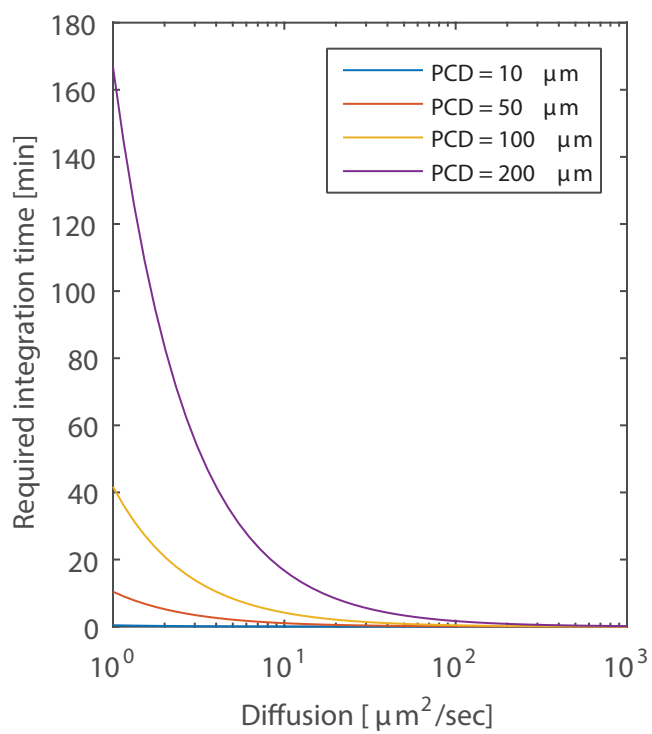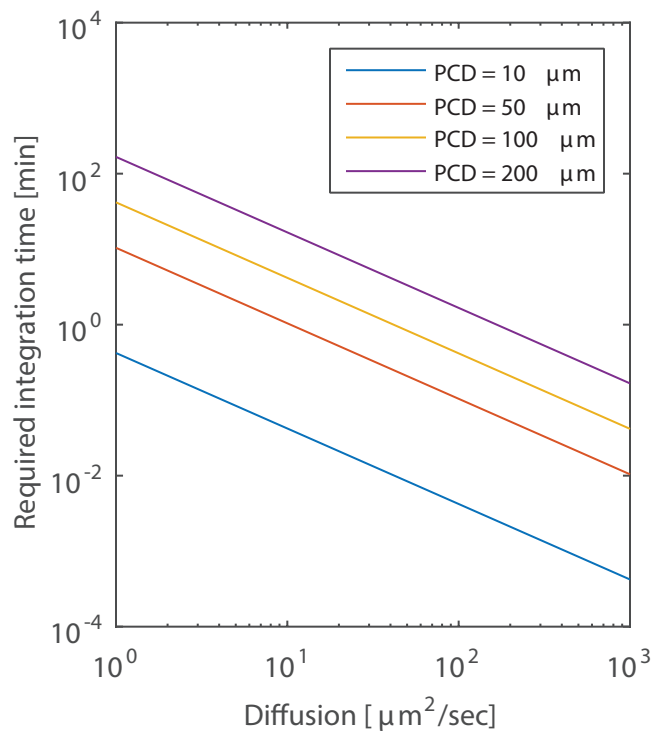

Supplement: supp [file elife-09652-supp-v1.zip › elife_poa_e09652_Figure_1_figure_supplement_7.pdf]

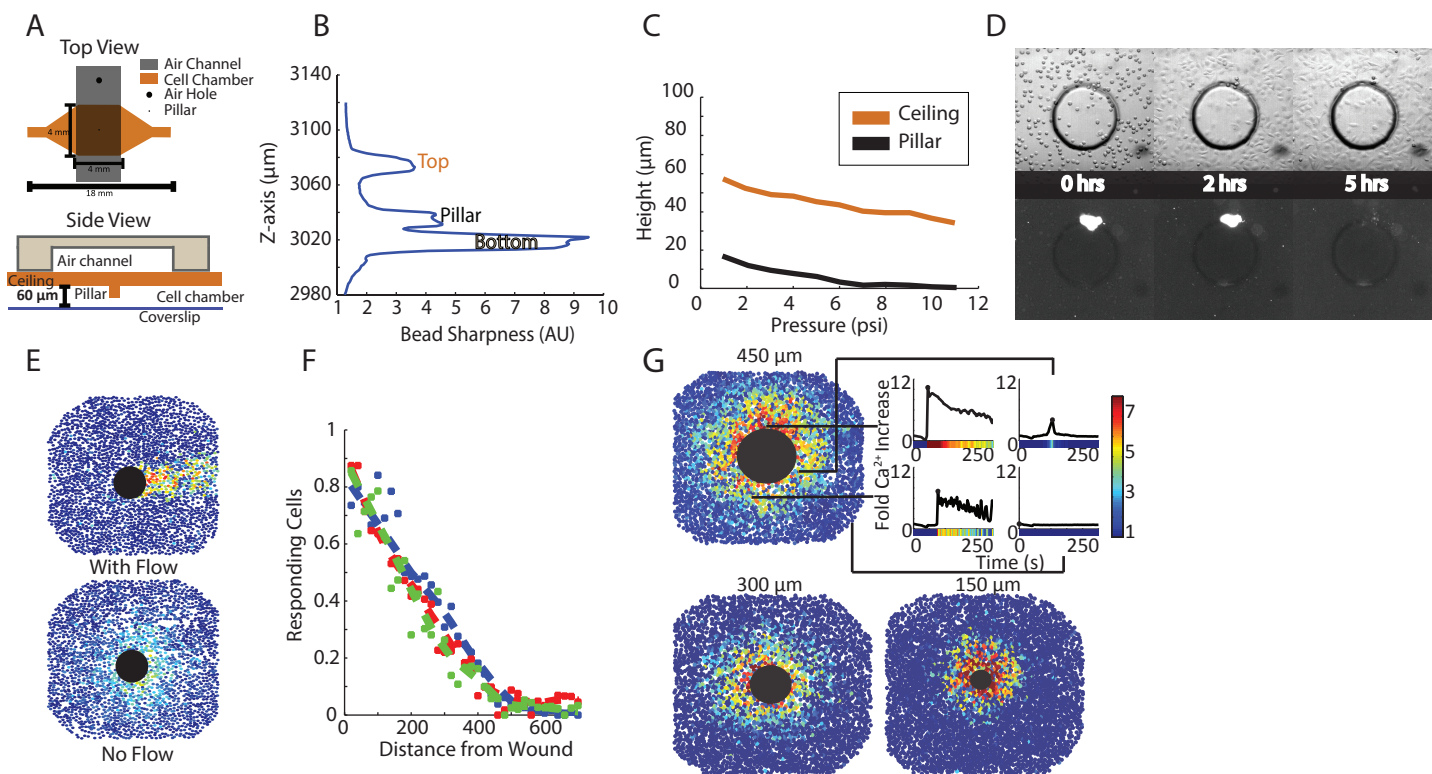

Supplement: supp [file elife-09652-supp-v1.zip › elife_poa_e09652_Figure_2_figure_supplement_1.pdf]

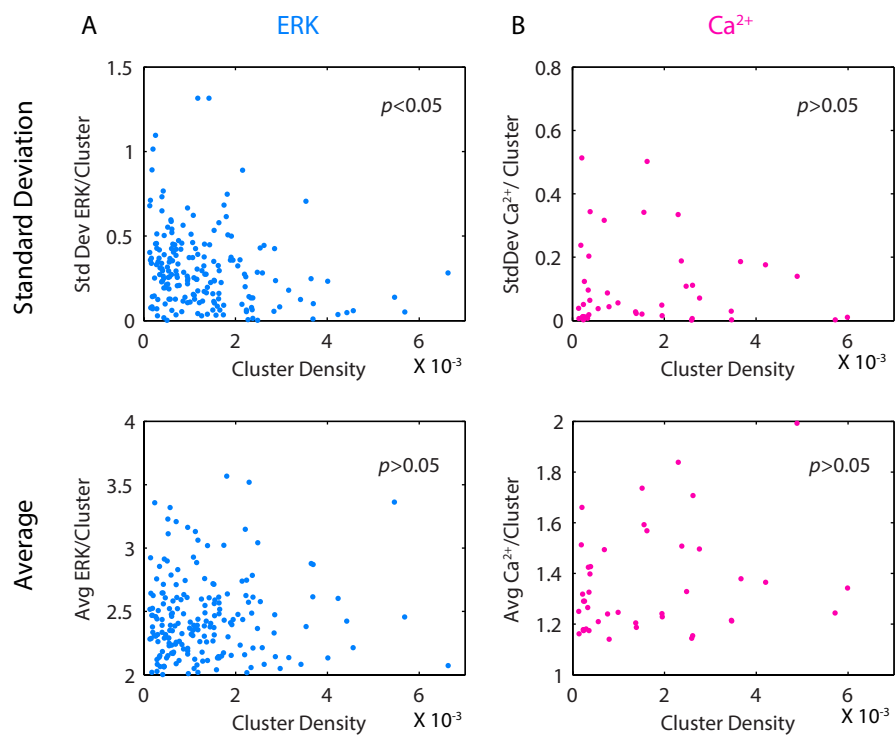

Supplement: supp [file elife-09652-supp-v1.zip › elife_poa_e09652_Figure_1_figure_supplement_2.pdf]

## ERK Depends on Src Activation

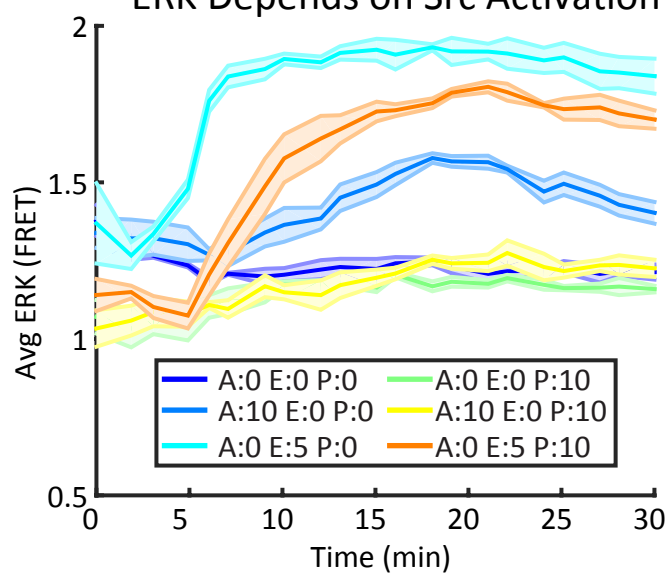

Supplement: supp [file elife-09652-supp-v1.zip › elife_poa_e09652_Figure_1_figure_supplement_3.pdf]

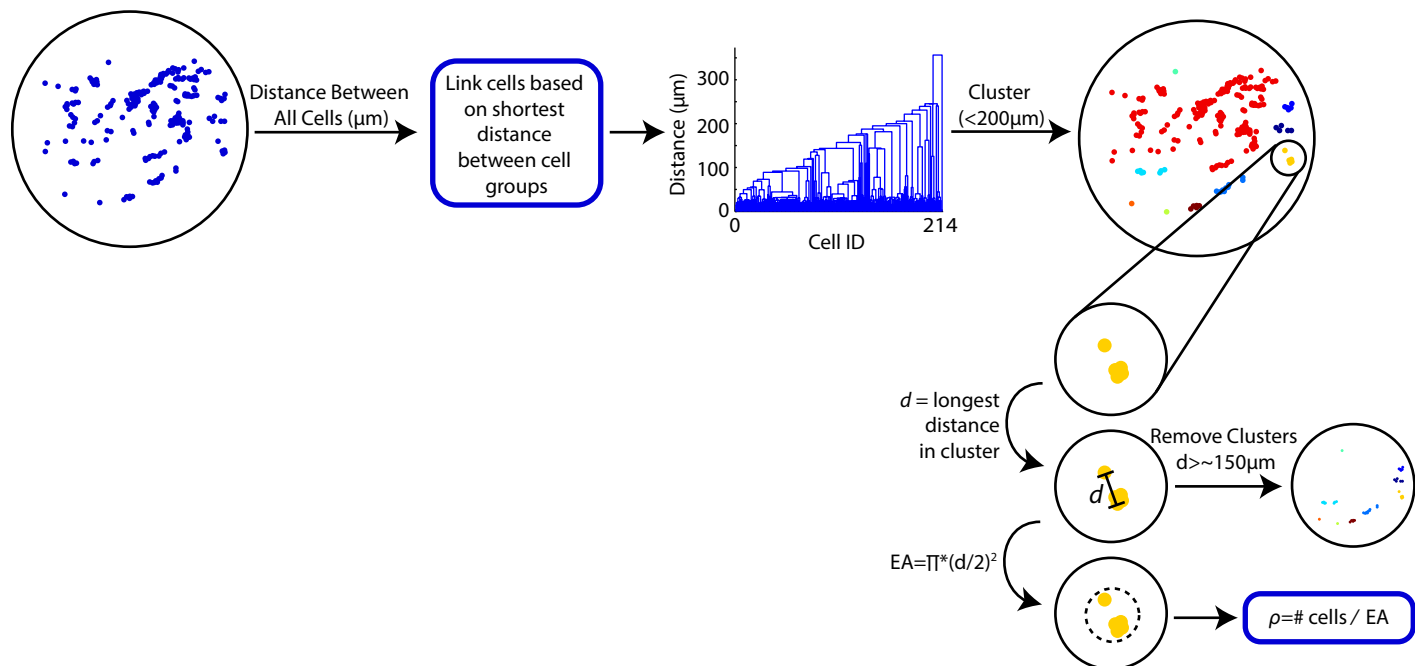

Supplement: supp [file elife-09652-supp-v1.zip › elife_poa_e09652_Figure_1_figure_supplement_1.pdf]

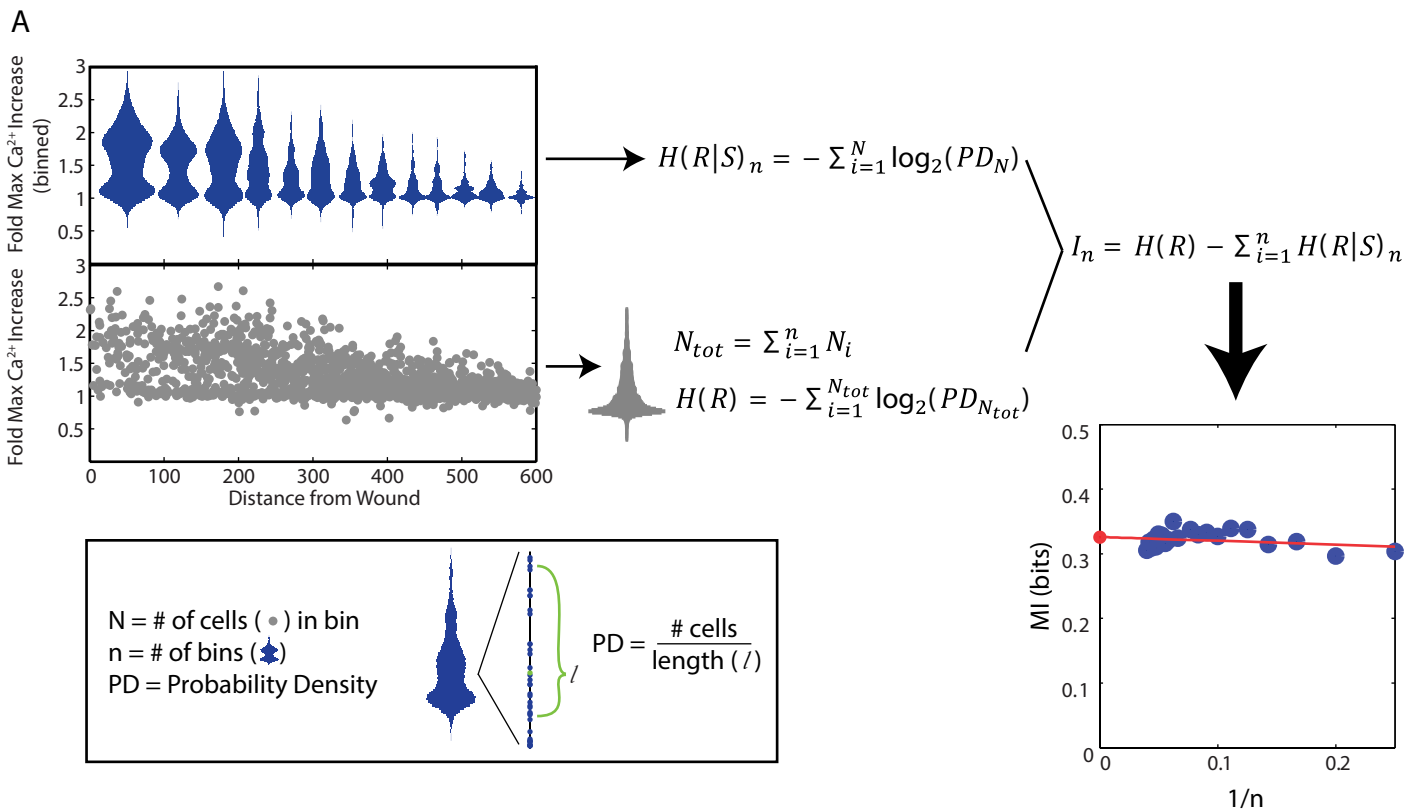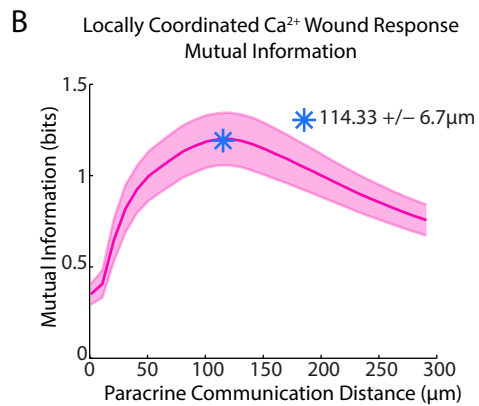

Supplement: supp [file elife-09652-supp-v1.zip › elife_poa_e09652_Figure_3_figure_supplement_1.pdf]
